# Supplementary material for: ABIN1 (Q478) is Required to Prevent Hematopoietic Deficiencies through Regulating Type I IFNs Expression
Source: PubMed Central journal article supplement (PMC10797436; doi:10.1002/advs.202303555), 2023-11-27

## Supporting Information

for *Adv. Sci.*, DOI 10.1002/adv.202303555

ABIN1 (Q478) is Required to Prevent Hematopoietic Deficiencies through Regulating Type I IFNs Expression

*Xuanhui Wu, Yong Wang, Bingyi Chen, Yongbo Liu, Fang Li, Yangjing Ou, Haiwei Zhang, Xiaoxia Wu, Xiaoming Li, Lingxia Wang, Wuwei Rong, Jianling Liu, Mingyan Xing, Xiaoming Zhao, Han Liu, Lingling Ge, Ankang Lv, Lan Wang, Zhichao Wang\*, Ming Li\* and Haibing Zhang\**

## Supporting Information:

### Supplemental Figure Legends

#### Supplemental Figure S1. Hematopoietic defects in *Abin1*<sup>Q478H/Q478H</sup> mice

- (a) Differential expression of TNIP1 in CD34<sup>+</sup> cells from healthy individuals and from patients with del(5q) myelodysplastic syndrome (MDS), from GEO(GSE19429) expression microarrays. (n = 17–46 patients/group)
- (b) Overall survival of patients with MDS stratified by CD34 expression. (n = 80 patients; TNIP1-Low: Z score < -0.65; TNIP1-Normal: -0.65 < Z score < 0.65; TNIP1-High: Z score > 0.65)
- (c) Schematic diagram of the *Abin1* gene and ABIN1 (Q478H).
- (d) Immunoblot analysis of ABIN1 in whole-cell lysates of spleen and bone marrow (BM).
- (e) Body weight of mice at the indicated age. (n ≥ 6 mice/group)
- (f) Sizes of the lymph nodes and spleens of 5-month-old wild-type (WT) and *Abin1*<sup>Q478H/Q478H</sup> mice.
- (g) Analysis of peripheral blood white blood cells (WBCs) from WT and *Abin1*<sup>Q478H/Q478H</sup> mice. (n ≥ 5 mice /group).
- (h–i) Lymph, Mon, and Gran at 5 months (h) and 10 months of age (i). (n ≥ 9 mice /group).
- (j) Quantification of the frequencies of CD3<sup>+</sup> and B220<sup>+</sup> cells in 10-month-old WT and *Abin1*<sup>Q478H/Q478H</sup> mouse spleens. (n ≥ 4 mice /group)
- (k) Quantification of splenic cell frequency in 5-month-old WT and *Abin1*<sup>Q478H/Q478H</sup> mice at the indicated erythroid differentiation stages (RI, proerythroblasts; RII, basophilic erythroblasts; RII, chromatophilic erythroblasts; RIV, orthochromatophilic erythroblasts). (n ≥ 4 mice /group)
- (l) Enlarged hematoxylin and eosin-stained image of liver tissue from a 10-month-old *Abin1*<sup>Q478H/Q478H</sup> mouse.
- (m) Hematoxylin and eosin staining of the liver tissue. Representative images of at least three mice of the indicated age per group. The panel data were analyzed using the two-tailed unpaired Student t-test, and statistical significance was indicated as follows: \*\*\*\* for P < 0.0001, \*\*\* for P < 0.001, \*\* for P < 0.01, and \* for P < 0.05.

**Figure S1**

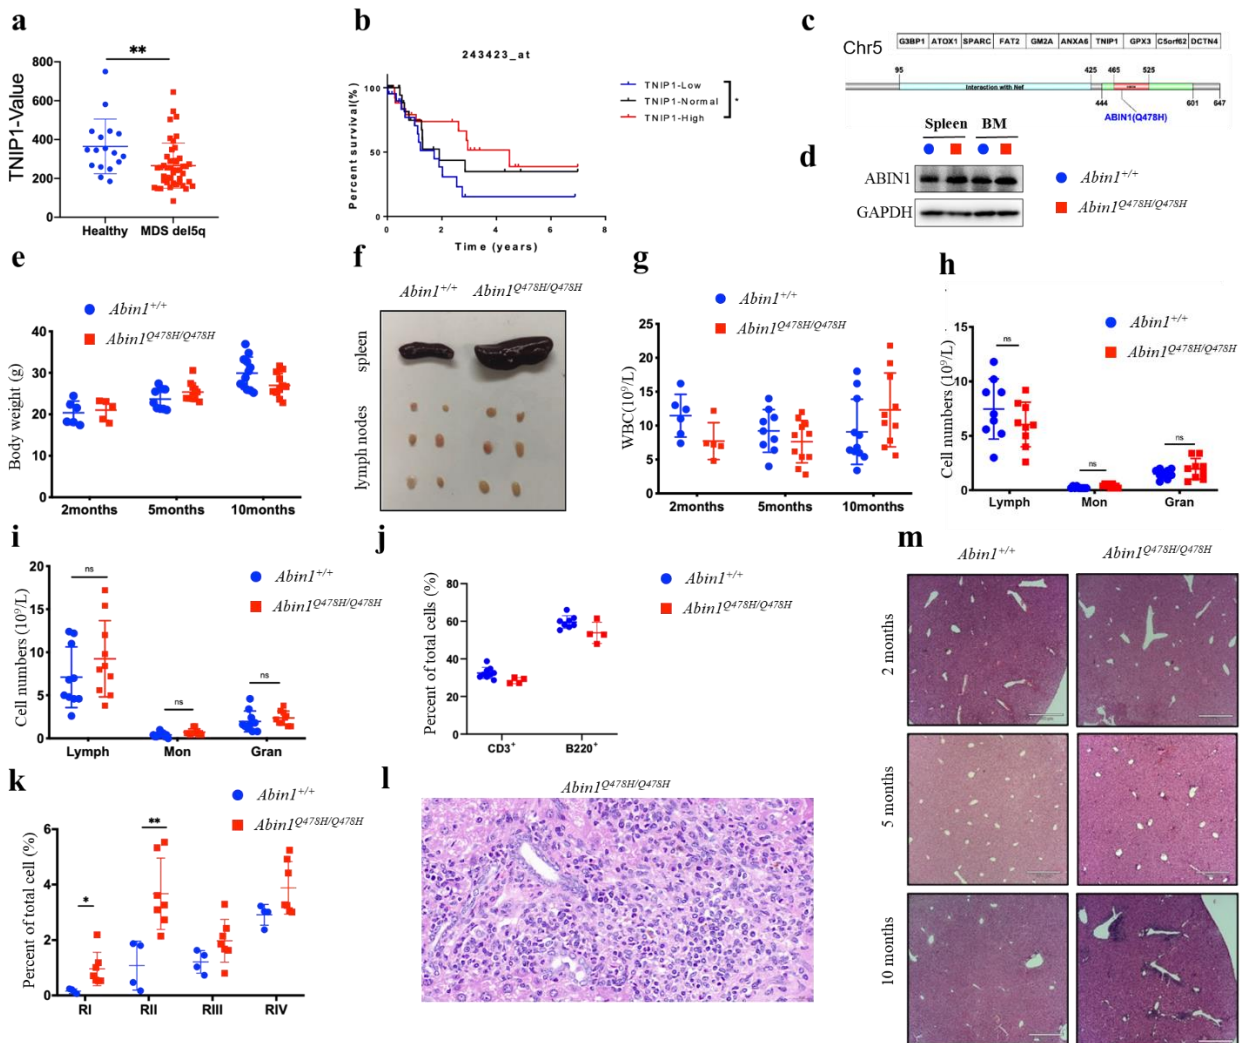

**Supplemental Figure S2. *Abin1*<sup>Q478H/Q478H</sup> mice had deficient bone marrow development**

(a) Reticular fiber-stained images of bone marrow (BM) from 5-month-old wild-type (WT) and *Abin1*<sup>Q478H/Q478H</sup> mice.

(b) Quantification of the frequencies of megakaryocyte-erythrocyte progenitors (MEPs), granulocyte-macrophage progenitors (GMPs), and common myeloid progenitors (CMPs) in BM cells from 5-month-old WT and *Abin1*<sup>Q478H/Q478H</sup> mice. (n ≥ 7 mice/group).

(c) The representative flow cytometry profiles of the LSK and LSK-subpopulation cells in the bone marrow of WT and *Abin1*<sup>Q478H/Q478H</sup> mice at 5 months old were obtained.

- (d) The frequencies of the LSK and LSK-subpopulation cells in the bone marrow of WT and *Abin1*<sup>Q478H/Q478H</sup> mice at 5 months old and 9 months old were quantified (n ≥ 3 mice/group).
- (e) Quantification of the total colony number and total cell number in colony-forming unit (CFU) assays. LSK-subpopulation cells ( $3 \times 10^3$ ) isolated from 5-month-old WT and *Abin1*<sup>Q478H/Q478H</sup> BM cells were plated for each assay. (n = 3 mice/group)
- (f) Cobblestone-area forming cell (CAFC) assays of LSK-subpopulation cells isolated from 5-month-old WT and *Abin1*<sup>Q478H/Q478H</sup> BM cells were plated for each assay. (n = 3 mice/group)
- (g) photo of cobblestone-area forming cell (CAFC) assays
- (h) Quantification of the frequencies of spleen cells at the indicated erythroid differentiation stages in 2-month-old WT and *Abin1*<sup>Q478H/Q478H</sup> BM cell-recipient mice. (n ≥ 4 mice/group)
- (i) Quantification of myeloid frequencies (CD11b<sup>+</sup> and Gr-1<sup>+</sup>) in spleen cells of 2-month-old WT and *Abin1*<sup>Q478H/Q478H</sup> BM cell-recipient mice 100 days after cell transplantation. (n ≥ 4 mice/group) The panel data were analyzed using the two-tailed unpaired Student t-test, and statistical significance was indicated as follows: \*\*\*\* for P < 0.0001, \*\*\* for P < 0.001, \*\* for P < 0.01, and \* for P < 0.05.

**Figure S2**

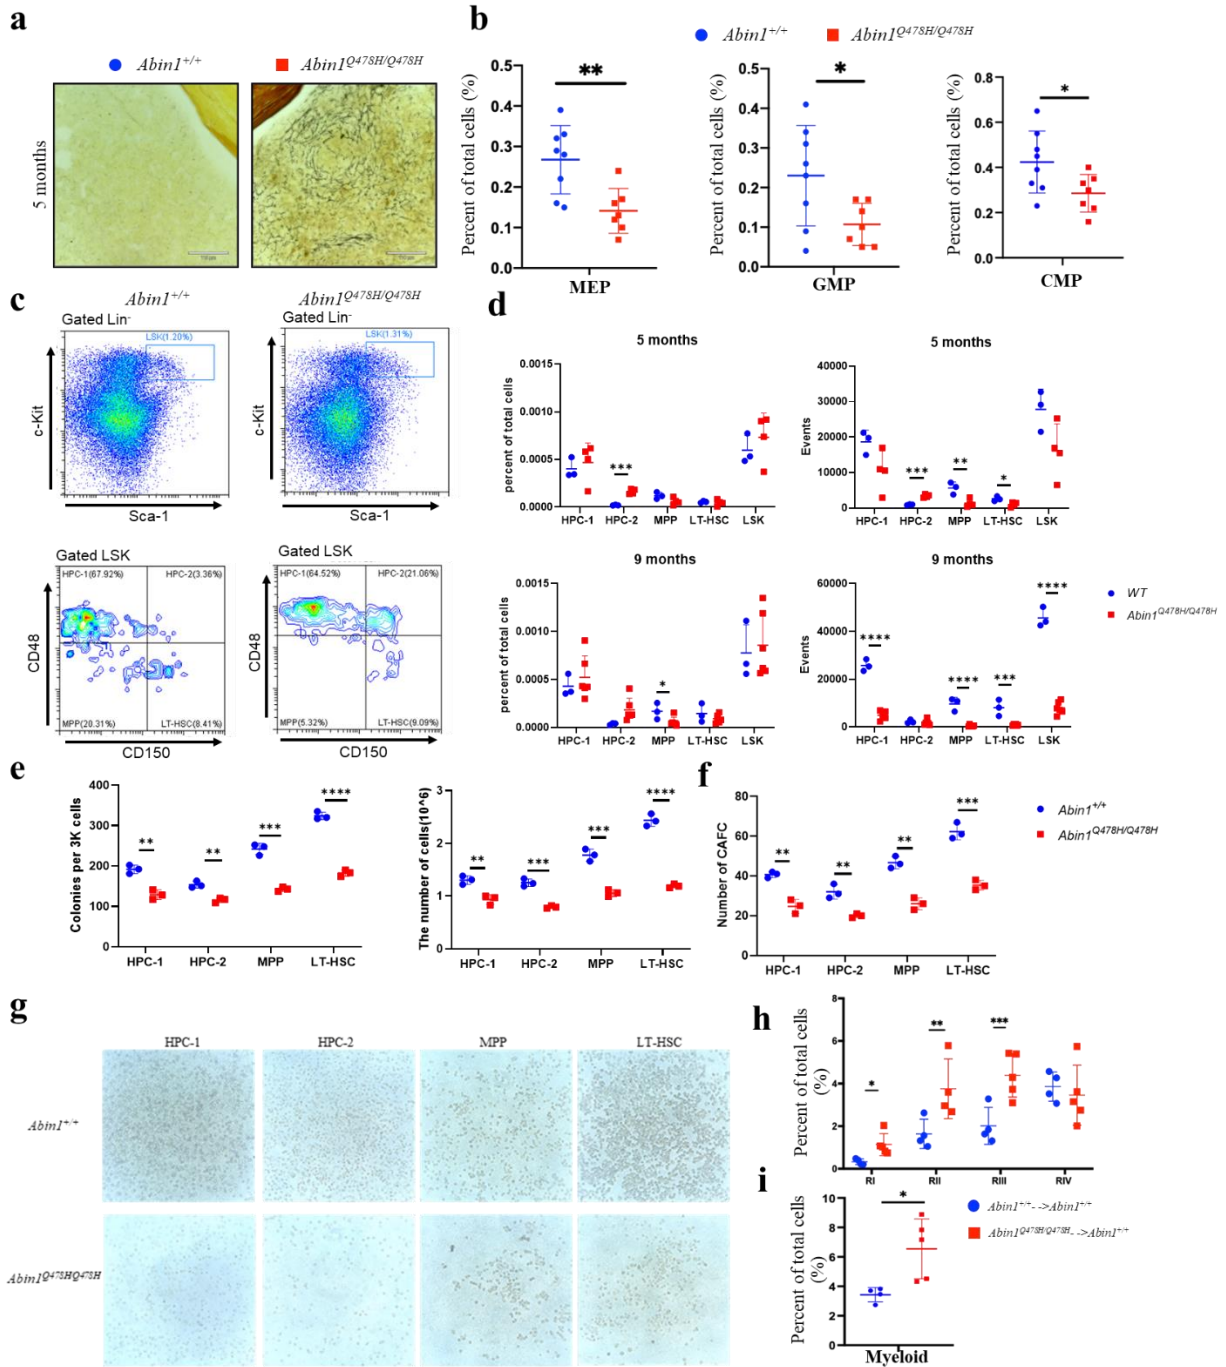

**Supplemental Figure S3. Ripk3 and its necroptosis function are not the reason for *Abin1*<sup>Q478H/Q478H</sup> developed thrombocytopenia**

(a) Cell survival of WT and *Abin1*<sup>Q478H/Q478H</sup> primary BMDMs treated with TNF $\alpha$ /Smac/zVAD (TSZ) or LPS/zVAD (LZ) in the presence or absence of Nec-1s

(b) Quantification of the frequency of splenic cells in 10-month-old *Abin1*<sup>Q478H/Q478H</sup> and *Abin1*<sup>Q478H/Q478H</sup>*Ripk3*<sup>-/-</sup> mice at the indicated erythroid differentiation stages (RI, proerythroblasts; RII, basophilic erythroblasts; RIII, chromatophilic erythroblasts; RIV, orthochromatophilic erythroblasts). (n ≥ 4 mice/group)

(c) Femurs and tibias of 10-month-old *Abin1*<sup>Q478H/Q478H</sup> and *Abin1*<sup>Q478H/Q478H</sup>*Ripk3*<sup>-/-</sup> mice.

(d) Spleen weights of 10-month-old *Abin1*<sup>Q478H/Q478H</sup>, *Abin1*<sup>Q478H/Q478H</sup>*Ripk3*<sup>-/-</sup>, *Abin1*<sup>Q478H/Q478H</sup>*Ripk1*<sup>K45A/K45A</sup>, and *Abin1*<sup>Q478H/Q478H</sup>*Mkl1*<sup>-/-</sup> mice. (n ≥ 10 mice/group)

(e-f) Peripheral blood analysis, including platelet (PLT) count (d) and hemoglobin level (e), of 10-month-old *Abin1*<sup>Q478H/Q478H</sup>, *Abin1*<sup>Q478H/Q478H</sup>*Ripk3*<sup>-/-</sup>, *Abin1*<sup>Q478H/Q478H</sup>*Ripk1*<sup>K45A/K45A</sup>, and *Abin1*<sup>Q478H/Q478H</sup>*Mkl1*<sup>-/-</sup> mice. (n ≥ 12 mice/group)

The panel data were analyzed using the two-tailed unpaired Student t-test, and statistical significance was indicated as follows: \*\*\*\* for P < 0.0001, \*\*\* for P < 0.001, \*\* for P < 0.01, and \* for P < 0.05.

**Figure S3**

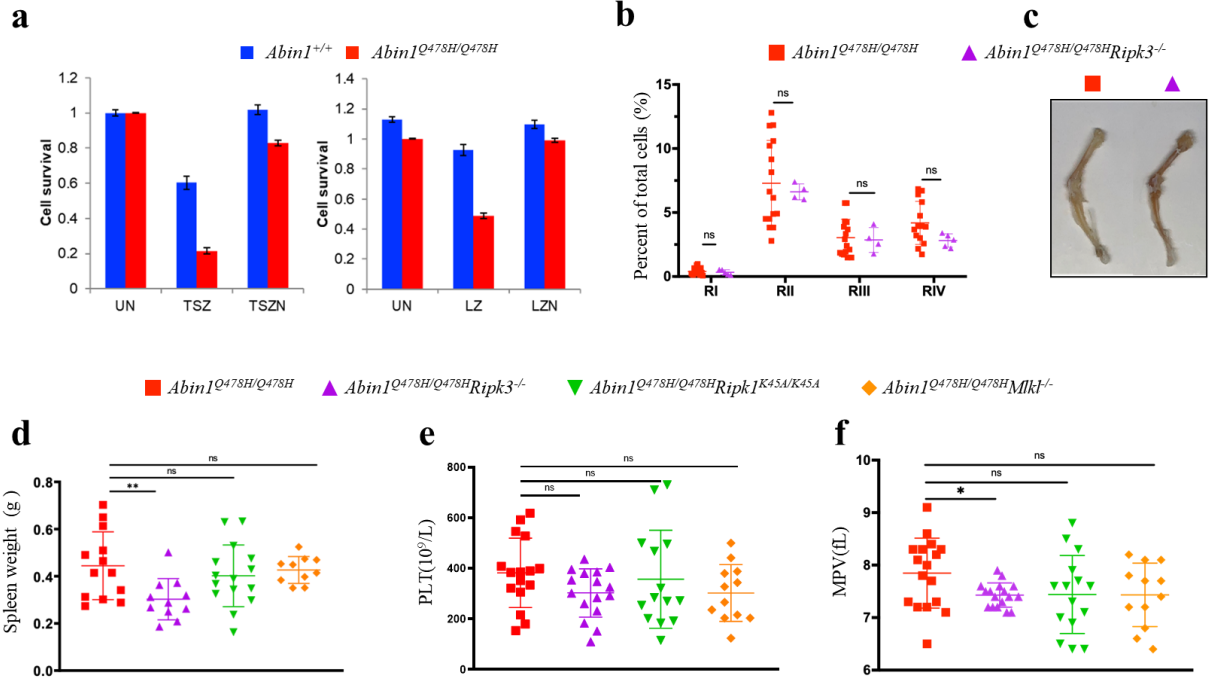

**Supplemental Figure S4. Interferon signaling is crucial for the manifestation of hematopoietic defects in *Abin1*<sup>Q478H/Q478H</sup> mice**

(a) Gene ontology related to interferon enrichment analysis of amplified HPC-1, HPC-2, MPP, and LT-HSC cells

(b) Peripheral blood analysis of 9-month-old *Abin1*<sup>Q478H/Q478H</sup> and *Abin1*<sup>Q478H/Q478H</sup>*Ifnar1*<sup>-/-</sup> mice, including red blood cell (RBC) count, hemoglobin (HGB) level, platelet (PLT) count, and mean platelet volume (MPV). (n ≥ 7 mice/group)

Figure S4

a

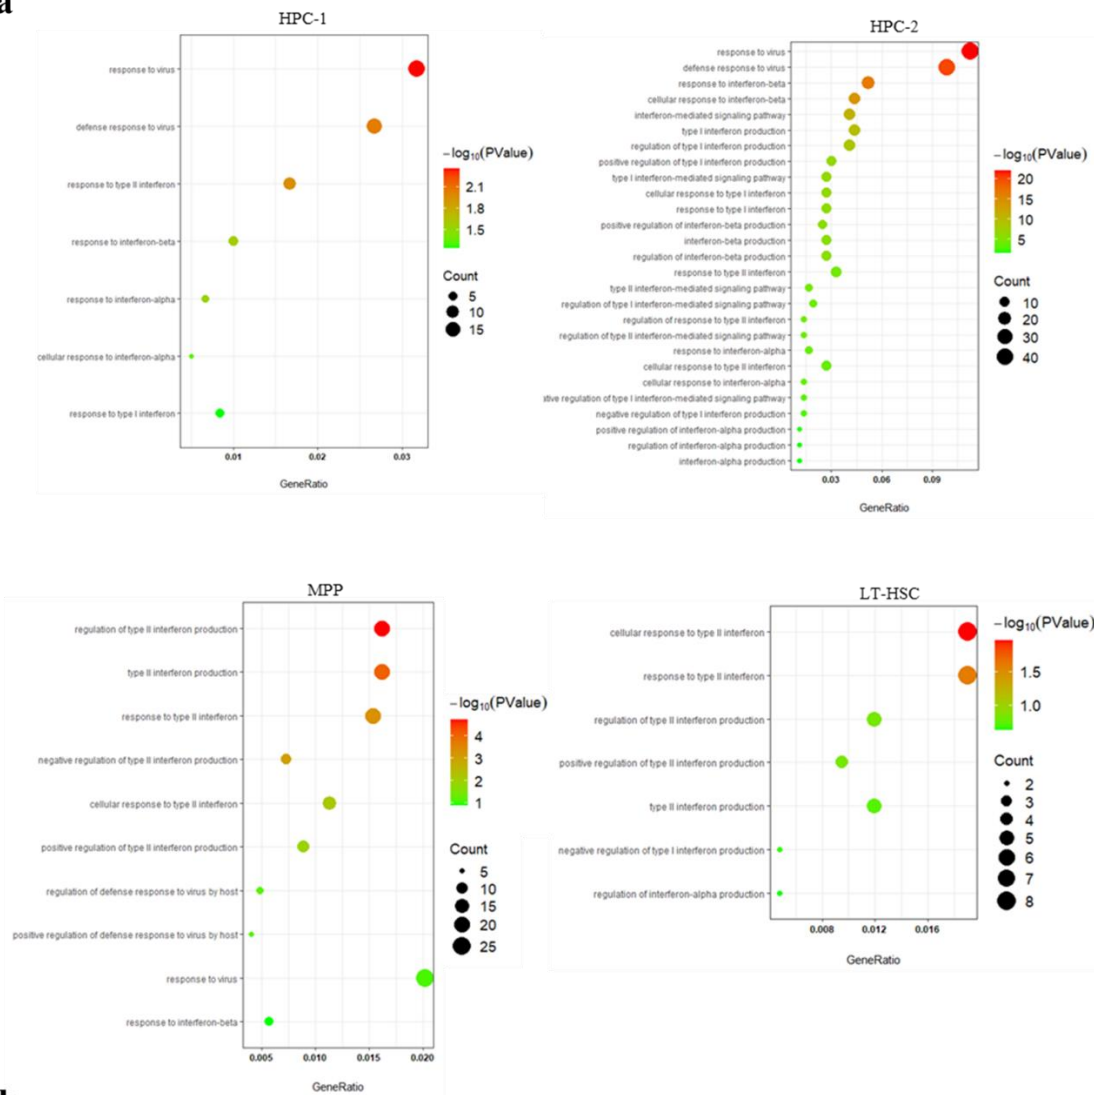

b

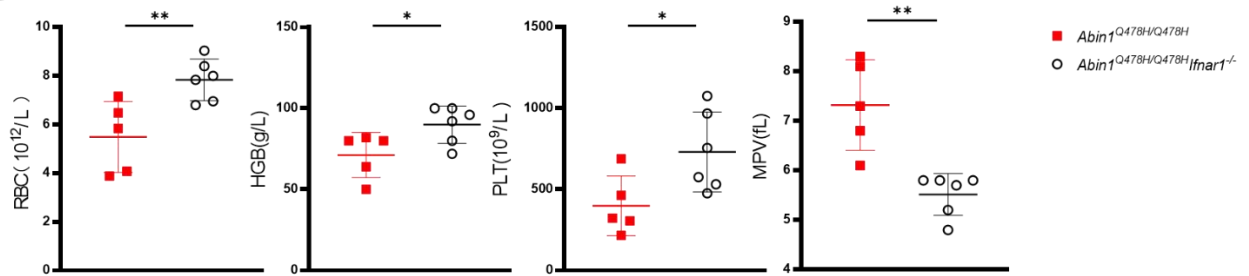



**Supplemental Figure S5. Schematic overview showing ABIN1 prevents hematopoietic deficiencies by regulating the expression of type I interferons.**

*Abin1*<sup>Q478H/Q478H</sup> knock-in mice with a mutation that disrupts the polyubiquitin-binding site exhibit hematopoietic deficiency. Deficiency of *Ripk3* could alleviate anemia. However, co-deletion of *Ifnar1* greatly rescued anemia, thrombocytopenia, and splenomegaly in the *Abin1*<sup>Q478H/Q478H</sup> mice, indicating that ABIN1 maintains normal hematopoiesis by regulating type I interferon signaling and RIPK3-mediated necroptosis-independent function.

**Figure S5**

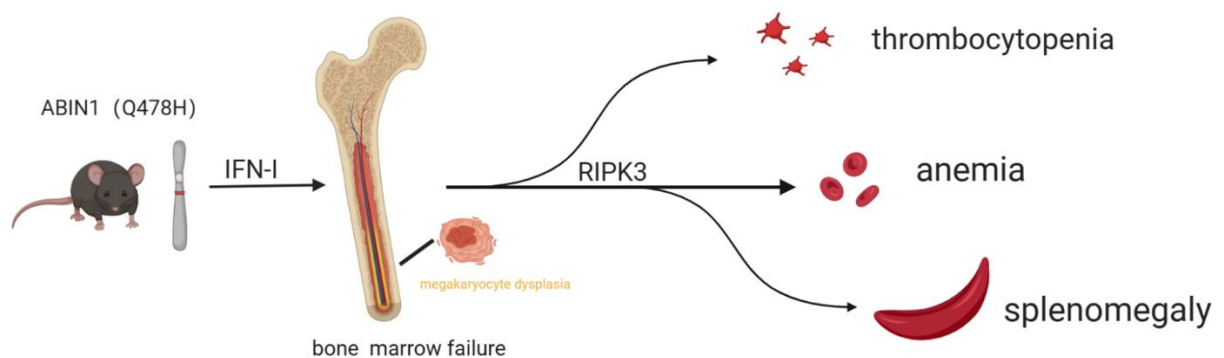

**Supplemental Figure S6. Hematopoietic deficiencies in *Abin1*<sup>Q478H/Q478H</sup> *Ripk3*<sup>-/-</sup> mice are independent of FADD expression levels.**

(a) Cell survival of wild-type (WT) and *Abin1*<sup>Q478H/Q478H</sup> primary mouse dermal fibroblasts (MDFs) treated with TNF $\alpha$ /cycloheximide (TC) for the indicated periods.

(b) Western blot analyses of wild-type (WT) and *Abin1*<sup>Q478H/Q478H</sup> primary mouse dermal fibroblasts (MDFs) treated with TNF $\alpha$ /cycloheximide (TC) for the indicated periods.

(c) With 100 $\times$  magnification, Giemsa-stained bone marrow cytopspins from 5-month-old *Abin1*<sup>Q478H/Q478H</sup> mice displayed abnormal apoptosis in immature red cell.

(d) Red blood cells (RBCs) of 5-month-old WT, *Abin1*<sup>Q478H/Q478H</sup>, *Abin1*<sup>Q478H/Q478H</sup>*Ripk3*<sup>-/-</sup>, *Abin1*<sup>Q478H/Q478H</sup>*Ripk3*<sup>-/-</sup>*Fadd*<sup>+/-</sup> mice. (n  $\geq$  7 mice/group). The panel data were analyzed using the two-tailed unpaired Student t-test, and statistical significance was indicated as follows: \*\*\*\* for P < 0.0001, \*\*\* for P < 0.001, \*\* for P < 0.01, and \* for P < 0.05.

**Figure S6**

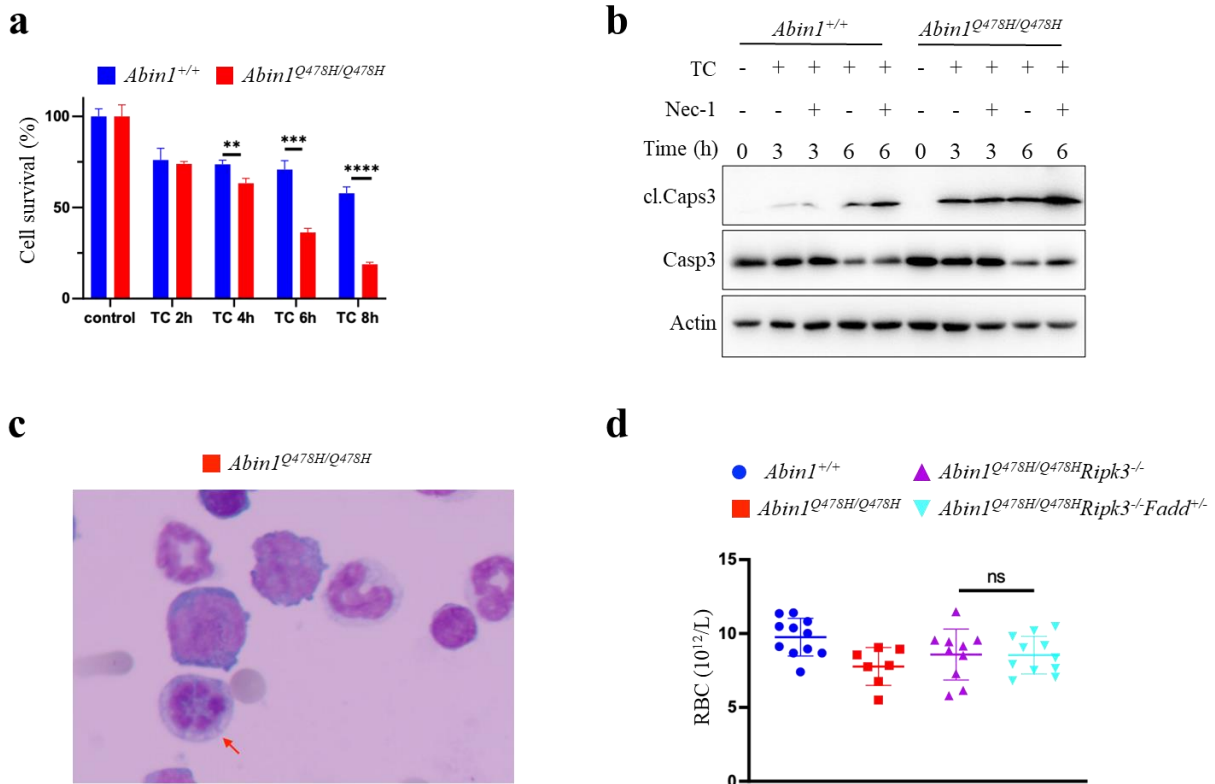

**Supplemental Figure S7. The relationship between hematopoietic defects and cellular senescence in *Abin1*<sup>Q478H/Q478H</sup> mice**

- (a) The frequencies of the LSK and LSK-subpopulation cells in the bone marrow of WT and *Abin1*<sup>Q478H/Q478H</sup> mice at 5 months old and 9 months old were quantified (n ≥ 3 mice/group).
- (b) Immunoblot analysis of P53 and P16 in whole-cell lysates of amplified HPC-1, HPC-2, MPP, and LT-HSC cells from 5-month-old WT and *Abin1*<sup>Q478H/Q478H</sup> mice.
- (c) Immunofluorescence staining of P53 and P21 proteins in 10-month-old WT and *Abin1*<sup>Q478H/Q478H</sup> mice, with a magnification of 40×(n ≥ 3 mice/group).
- (d) Expression levels of cdkn2a, cdkn1a, Trp53, and Itga2b in amplified HPC-1.
- (e) Expression levels of cdkn2a, cdkn1a, Trp53, and Itga2b in amplified HPC-2.
- (f) Expression levels of cdkn2a, cdkn1a, Trp53, and Itga2b in amplified MPP.
- (g) Expression levels of cdkn2a, cdkn1a, Trp53, and Itga2b in amplified LT-HSC.
- (h) Differentially expressed genes related to cell senescence were identified through expression profiling of Lin<sup>-</sup> BM cells from 5-month-old WT and *Abin1*<sup>Q478H/Q478H</sup> mice

The panel data were analyzed using the two-tailed unpaired Student t-test, and statistical significance was indicated as follows: \*\*\*\* for P < 0.0001, \*\*\* for P < 0.001, \*\* for P < 0.01, and \* for P < 0.05.

**Figure S7**

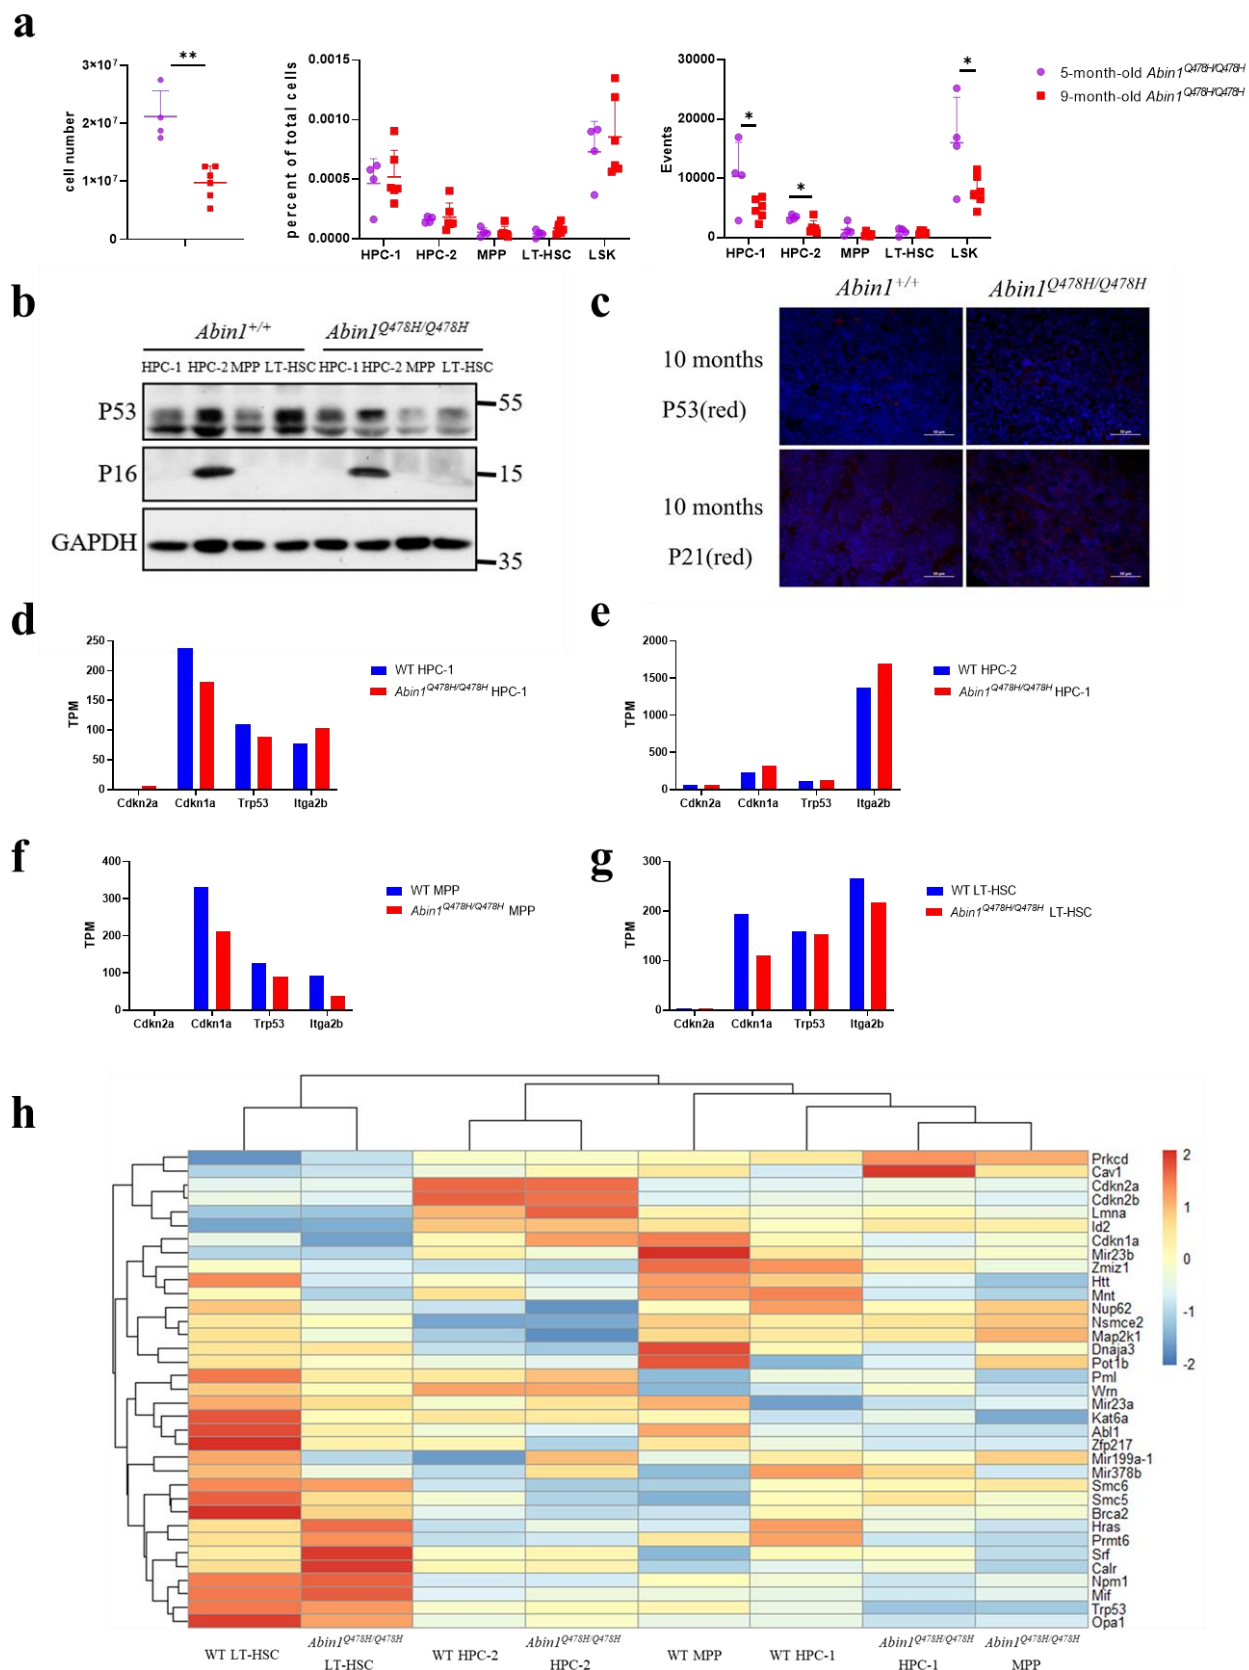

Supplement: ADVS-11-2303555-s001.pdf [file ADVS-11-2303555-s001.pdf]
